# Supplementary material for: Differentiation Capacity of Porcine Skeletal Muscle-Derived Stem Cells as Intermediate Species between Mice and Humans
Source: MDPI journal article supplement (doi:10.3390/ijms24129862), 2023-06-07
Supplement: s1 [file s1]

**Table S1.** Pig PCR primers.

|    | Gene Name             |                                      | Product Size |                                                  |
|----|-----------------------|--------------------------------------|--------------|--------------------------------------------------|
| 1  | MyoD                  | pg_myod_F<br>pg_myod_R               | 152          | TCCGACGGCATGATGGATTATAG<br>TCCACGATGCTGGACAGACAG |
| 2  | Myf5                  | pg_myf5_F<br>pg_myf5_R               | 218          | GCATGCCTGAATGCAACAGC<br>AGAATCGGTGCTGGCAACTG     |
| 3  | Pax3                  | pg_Pax3_F<br>pg_Pax3_R               | 158          | GCACCAGGCATGGATTTTCC<br>ATAGTCGGTCTGCGGCTGATG    |
| 4  | Pax7                  | pg_Pax7_F<br>pg_Pax7_R               | 116          | AGCTTCTCCAGCTACTCCGACAG<br>GCACTGGGGTTGCTCAGAATG |
| 5  | M-cad                 | pg_Mcad_F<br>pg_Mcad_R               | 119          | AGCGTCATCCTGCTGCTCTTG<br>AGGATGTTGTCCCGGAGATCG   |
| 6  | Myogenin              | pg_myog_F<br>pg_myog_R               | 231          | AGCGCCATCCAGTACATCGAG<br>GGAGTGCAGATTGTGGGCATC   |
| 7  | Skeletal muscle actin | pg_a_skel_act_2F<br>pg_a_skel_act_2R | 470          | CCACAACGTGCCCATCTATGA<br>TCTCCTTCTGCATGCGGTCA    |
| 8  | NCAM1                 | pg_NCAM1_F<br>pg_NCAM1_R             | 158          | ATCTCATGGTTCCGCGATGG<br>TCCTGTCCAATGCGGTTTAC     |
| 9  | Cacnb1                | pg_Cacnb1_F<br>pg_Cacnb1_R           | 211          | TCGAGCGAATCTTCGAGCTG<br>TTCTCCGAGGCCGCTATTTG     |
| 10 | NG2                   | pg_NG2_F<br>pg_NG2_R                 | 109          | TCAACGGACGGGTATTGCTG<br>TCCAGGGCTCCTTTGTGTGAG    |
| 11 | Pmp22                 | pg_Pmp22_F<br>pg_Pmp22_R             | 197          | TGGCAAACTGCACCACCTC<br>ATCTGGAAGACCCCGGTGATG     |
| 12 | p75                   | pg_p75_F<br>pg_p75_R                 | 116          | ACCGACAACCTCATCCCTGTC<br>TTGGCTCCTTGCTTGTCTGTC   |
| 13 | Sox10                 | pg_Sox10_F<br>pg_Sox10_R             | 157          | TCAGACGGAACCTGAGCAC<br>CGTTCGGAAGTCGATGTGAG      |
| 14 | BDNF                  | pg_BDNF_F<br>pg_BDNF_R               | 222          | CCAGAAAGTTCGGCCCAATG<br>ACCCACTCGCTAATGCTGTGCG   |
| 15 | GDNF                  | pg_GDNF_F<br>pg_GDNF_R               | 127          | TGACTTGGGTTTGGGCTACG<br>CACCAGCCGTCTGTTTTTGG     |
| 16 | Ninjurin              | pg_Ninjurin_F<br>pg_Ninjurin_R       | 123          | CCAGCTTCGCCTTCTTCATCC<br>CATGCTTGGCAGGGTTGTTG    |
| 17 | a-SMA                 | pg_aSMA_F<br>pg_aSMA_R               | 138          | CTTCGTGTTGCCCCAGAAGA<br>CACCGCCTGAATAGCCACAT     |
| 18 | Smoothelin            | pg_smoothelin_F<br>pg_smoothelin_R   | 175          | TGAAGACCACGTTACCATCG<br>GGGCTGCTGATATGGGTGATG    |
| 19 | VE-cad                | pg_VEcad_F<br>pg_VEcad_R             | 176          | GACAGCAACTTCACCCTCACG<br>TTGCACTTGACACGCGTCAC    |
| 20 | VEGF                  | pg_VEGFA_F<br>pg_VEGFA_R             | 193          | TACTGCCGTCCAATCGAGACC<br>GGCCTTGGTGAGGTTTGATCC   |
| 21 | CD34                  | pg_CD34_F<br>pg_CD34_R               | 238          | TCCTTGCTCCTTGCCCAATC<br>AGCCAGTGATGCCCAAGACAG    |
| 22 | GAPDH                 | pg_GAPDH_F<br>pg_GAPDH_R             | 260          | TCGGAGTGAACGGATTGCG<br>CGTGGGTGGAATCATACTGG      |
